# Supplementary material for: Multiple-Insecticide Resistance in Anopheles gambiae Mosquitoes, Southern Côte d’Ivoire
Source: PubMed Central journal article supplement (PMC3437712; doi:10.3201/eid1809.120262), 2012-09
Supplement: 12-0262-Techapp-s1.pdf [file 12-0262-Techapp-s1.pdf]

# Multiple-Insecticide Resistance in *Anopheles gambiae* Mosquitoes, Southern Côte d'Ivoire

## Technical Appendix

Table. Time–death data for adult female *Anopheles gambiae* s.s. Tiassalé strain and standard susceptible colony Kisumu 24 hours after exposure to bendiocarb or deltamethrin

| Strain   | Insecticides            | Parameters    | Exposure time (min) |    |    |    |    |    |    |    |     |     |     |     |     |     |     |     |     |     |     |     |
|----------|-------------------------|---------------|---------------------|----|----|----|----|----|----|----|-----|-----|-----|-----|-----|-----|-----|-----|-----|-----|-----|-----|
|          |                         |               | 0.5                 | 1  | 2  | 3  | 5  | 10 | 15 | 25 | 30  | 60  | 120 | 240 | 260 | 280 | 330 | 340 | 360 | 480 | 720 |     |
| Tiassalé | Bendiocarb<br>(0.1%)    | No. tested    |                     |    |    |    |    |    |    |    |     | 100 |     | 100 |     | 100 | 100 | 100 | 100 | 100 |     |     |
|          |                         | No. dead      |                     |    |    |    |    |    |    |    |     | 12  |     | 28  |     | 45  | 62  | 67  | 78  | 80  |     |     |
|          |                         | Mortality (%) |                     |    |    |    |    |    |    |    |     | 12  |     | 28  |     | 45  | 62  | 67  | 78  | 80  |     |     |
|          | Deltamethrin<br>(0.05%) | No. tested    |                     |    |    |    |    |    |    |    |     | 100 | 100 | 100 | 100 |     |     |     |     | 100 | 100 | 100 |
|          |                         | No. dead      |                     |    |    |    |    |    |    |    |     | 32  | 34  | 49  | 87  |     |     |     |     | 94  | 95  | 98  |
|          |                         | Mortality (%) |                     |    |    |    |    |    |    |    |     | 32  | 34  | 49  | 87  |     |     |     |     | 94  | 95  | 98  |
| Kisumu   | Bendiocarb<br>(0.1%)    | No. tested    |                     |    |    |    | 50 | 50 | 50 | 50 | 50  |     |     |     |     |     |     |     |     |     |     |     |
|          |                         | No. dead      |                     |    |    |    | 2  | 13 | 43 | 48 | 50  |     |     |     |     |     |     |     |     |     |     |     |
|          |                         | Mortality (%) |                     |    |    |    | 4  | 26 | 86 | 96 | 100 |     |     |     |     |     |     |     |     |     |     |     |
|          | Deltamethrin<br>(0.05%) | No. tested    | 50                  | 50 | 50 | 50 | 50 | 50 |    |    |     |     |     |     |     |     |     |     |     |     |     |     |
|          |                         | No. dead      | 11                  | 23 | 28 | 46 | 49 | 49 |    |    |     |     |     |     |     |     |     |     |     |     |     |     |
|          |                         | Mortality (%) | 22                  | 46 | 56 | 92 | 98 | 98 |    |    |     |     |     |     |     |     |     |     |     |     |     |     |

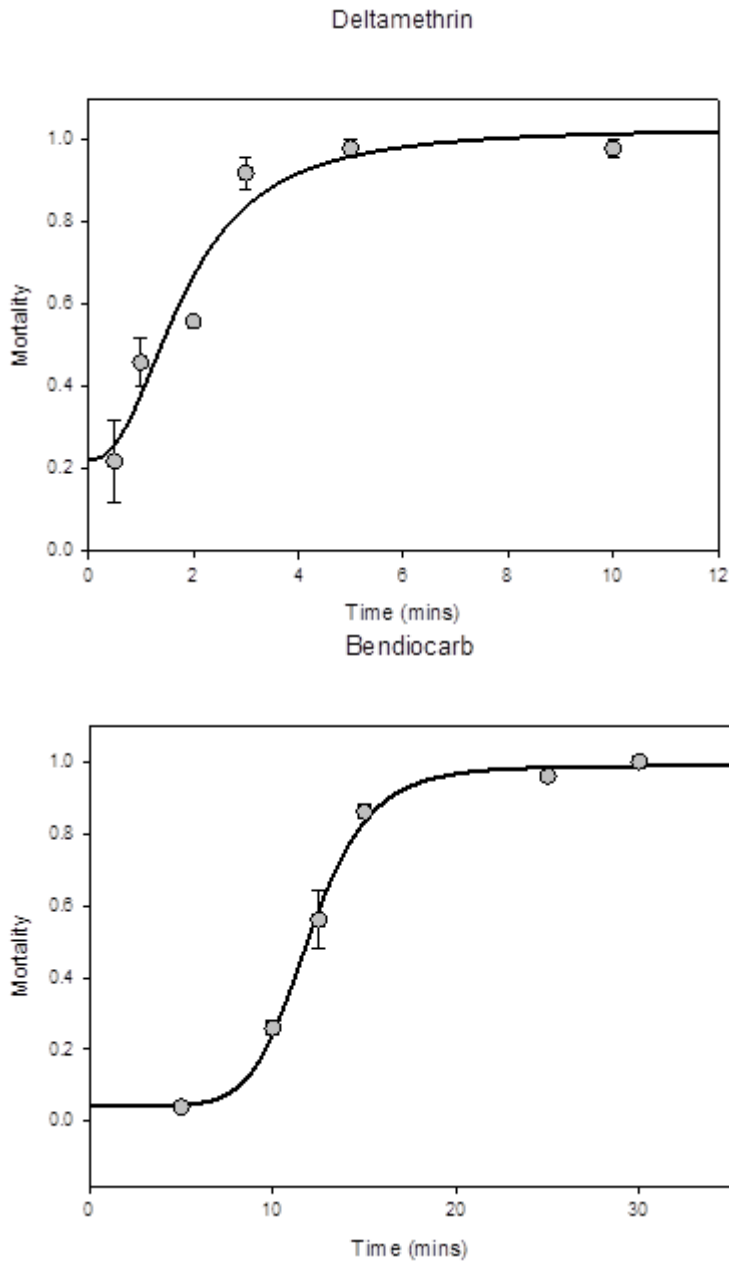

Figure. Time-death curve for *Anopheles gambiae* mosquitoes, Kisumu strain, exposed to (top) deltamethrin (median time to death = 1.8 minutes,  $R^2= 0.93$ ) and (bottom) bendiocarb (median time to death = 12 minutes,  $R^2= 0.99$ ).
